# Supplementary material
Source: publisher figshare collection journal article supplement (https://tandf.figshare.com/articles/dataset/_/7048538)
Supplement: Supplementary file 1 [file 1 › idre_a_1492634_sm6776.docx]

# Supplemental File 2:

# Themes and Repeating Ideas from Focus Group Discussions

The following pages detail the repeating themes/ideas expressed by focus group participants organized into six major thematic categories: residual limb problems encountered, current management of residual limb problems, proposed methods to better manage residual limb problems, receptivity towards a residual limb monitoring system, vision for a residual limb monitoring system, and residual limb monitoring system configuration suggestions.

# RESIDUAL LIMB PROBLEMS (RLPs)

## Discomfort

- Bulk behind the knee
- ‘Clunkiness’ and inflexibility of prosthetic components
- Itching/cramping
- Discomfort from chafing

## Hygiene

- Smell of limb

## Pain

- Phantom limb pain
- Nerve pain
- Pain from walking for long periods of time
- Pain when residual limb starts bottoming out in socket
- Pressure and pain below the knee
- Burning feeling when scratching limb
- Cramping
- Loss of circulation when too many sock plies are added
- Pain/discomfort resulting from compression of knee when inactive
- Neuroma
- Constriction of muscles in socket

## Sensation

- Areas of desensitization or lack of sensation in residual limb
- Brand new amputees don’t necessarily have sensation under control
- Difficult for patients to know when they're experiencing heightened areas of pressure or heightened areas of force
- Ability for patient to self-inspect is dependent on etiology, scarring, presence of graft tissue, and/or other comorbidities

## Skin

- Skin breakdown
- Dermatology issues
- Sensitive skin
- Rash
- Open sore, sore
- Folliculitis
- Massive abscess
- Latex allergies
- Itchy skin
- Skin irritation
- Friction issues
- “Super hickey” or blister form when vacuum does not work properly
- Scarring or presence of graft tissue are difficult to deal with
- Ingrown hairs
- Residual limb wounds can take months to heal when amputee has peripheral vascular disease or diabetes

## Temperature

- Increased temperature within the socket during use
- Sensitivity to heat
- Sweating
- Changes in weather condition affect sock ply

## Volume

- Volume fluctuation

# METHODS TO MANAGE RESIDUAL LIMB PROBLEMS (RLPs)

## Communication

- Email
- Call
- Video chat (e.g. FaceTime or Skype)
- Text messaging
- Photos of residual limb problem
- Good prosthetist-patient relationship and communication is very important
- Patient describes in detail the residual limb problem to the prosthetist
- Facebook
- Prosthetist is in contact with Allied Health, patient’s therapist, and/or nursing home
- Patient sends videos of residual limb problem

## Education

- Give patients verbal and written instructions
- Give patients detailed instructions
- Give patients handouts explaining how to manage sock ply
- Spend a lot of time getting the patient to practice health care related to the residual limb
- Educating family members, nursing staff, physical therapists, and occupational therapists
- Give checklists for patients to follow when troubleshooting residual limb problems
- Age-appropriate education
- Discuss the problem, demonstrate how to troubleshoot, and make sure the patient can demonstrate how to troubleshoot a problem before leaving the clinical office
- Explain to the patient what different levels of skin redness in different areas of the limb means
- Explain to the patient how tight the prosthesis should be when it is fitting well and then show them what it feels like if it is loose or too tight
- Show the patient what it feels like to have vacuum and no vacuum
- Use pictures and video to educate the patient

## Influencing Factors

- It is common with new amputees to be high maintenance
- Type of clothing worn can affect if the patient can address a problem (e.g. when wearing a suit)
- The physical environment the patient is in can affect if the patient can address a problem (e.g. sitting in an airplane)
- Break-in period when the patient gets a new or adjusted socket
- Etiology of amputation can result in challenges for the patient to be able to self-inspect problems
- Number of years as an amputee affects the way patients manage their residual limb problems – new amputees do not have their sensation under control
- When patients get excited about being up on their feet and over-do it, wearing their socket for too long and walking around too much
- Diminished sensation in the residual limb
- Cognitive difficulties or the ability to synthesize into words where exactly they are experiencing a problem

## Patient-reliability

- Sometimes during a clinical visit, patients forget about problems that happened a couple weeks ago and do not end up reporting everything
- Having someone other than the patient accountable and taking responsibility for monitoring the patient’s limb health
- Doubts about accuracy of patient’s reports, especially changes they may have made to their prosthesis
- Sometimes patients report that the problems happened overnight when sleeping
- Giving all patients full responsibility for taking care of their limb may result in more residual limb problems occurring
- Patients have trouble recalling every event that may have contributed to the residual limb problem and the prosthetist has to spend a lot of time going over what they did to try to track down the issue that led to the problem

## Problem Solving

- Make adjustments to the socket
- Manage sock ply
- Massage calf when cramps occur
- Sit down, take off prosthesis, and rest for a few minutes
- Use Arnica Gel to cool and soothe the skin
- Pour the sweat out of the socket or wipe the socket
- Put an ice pack on the limb
- Adjust the prosthesis
- Put SensiCare lotion or Tegaderm on the limb to reduce friction in the socket
- Go to the hospital to drain abscess
- Apply CertainDry deodorant on residual limb skin
- Attempted to make a soft socket with a ratchet to tighten the socket
- Put Band-Aids on the limb
- When wearing shorts, roll down the top of the liner or sleeve to let leg breathe
- Perform skin checks when problem arises
- Wash the liner
- Cope with residual limb problem until patient has reached destination
- Use crutches and wear the prosthesis only when really needed
- Get surgical revision on amputation (e.g. shorten femur for a knee disarticulate amputee)
- Use a gaiter
- Turn the vacuum off or turn it higher
- Have re-check appointments after receiving any new prosthetic components
- Provide patient with gel or foam pads for the socket
- Make sure patient demonstrates how to don the liner correctly before they leave the clinical office
- Perform a skin check on the residual limb throughout dynamic alignment procedure
- Have the patient use a checklist to troubleshoot problems outside of the clinical office

# PROPOSED METHODS TO BETTER MANAGE RESIDUAL LIMB PROBLEMS (RLPs)

## Better Education

- Blogs about residual limb problems
- A book about residual limb problems and management for new amputees
- Prosthetists should spend a lot of time improving how they educate their patients to make sure that these problems can be averted, but that takes a lot of time and effort
- Patients should have continued practice with following instructions related to prosthesis use in a controlled environment with their occupational or physical therapist
- Better train therapists to be able to recognize socket fit issues
- Have peer support for patients from other amputees in the community

## Detection

- Detect when a problem is emerging before the problem gets severe
- Detect limb or fit issues during the check socket phase
- Detect if there is too much pressure on the limb in the socket

## Objective Info

- Information that either replaces or assists with patient feedback
- To see what is going on in the socket when patients have issues during certain activities
- Range of volume during the day, specifically where and what the maximum and minimum pressure points were
- Data that can help identify a trend
- Information to determine what is causing the problem
- Information about the fit and pressure points of the socket with movement (when and where there is contact or no contact between the limb and socket)
- Information that helps the patient recognize when they are bottoming out and need to add a sock or some other troubleshooting action
- Pressure or temperature data
- Information that detects where volume loss occurs
- Daily pattern of patient activities and socket fit
- Document K-level
- Having quantifiable data that are useful and accurate

## Technology

- An app for the patient to record, report, and troubleshoot residual limb problems
- System that can accommodate limb changes in volume and shape
- An app that makes changes to the socket depending on conditions within the socket
- Cooling system for the socket interface
- Mechanism to control temperature changes
- Increase the lifetime of sleeves
- A wearable ice pack for the residual limb in a socket
- A way to dispose of moisture or sweat within the socket
- A mechanism that allows the patient to control pressure within the socket
- Cooler liner
- Lighter weight and more flexible prosthetic components and devices
- Disposable sleeves
- Disposable liners
- A material or system that lets the residual limb skin breathe when using the prosthesis
- More research on materials for sockets
- Anti-bacterial prosthetic components
- Soft socket with a ratchet for tightening the fit of the socket throughout the day
- Suspension system with mechanism similar to a Chinese finger puzzle
- More flexible and softer prosthetic components
- Sock management tool
- X-ray vision of the residual limb in the socket

# RECEPTIVITY TOWARDS A RESIDUAL LIMB MONITORING SYSTEM (RLMS)

## Potential Benefits

- Reduce number of clinical visits
- Useful for fitting new socket or prosthesis
- Lead to the relief of pain
- Allows the patient to react pre-emptively to residual limb problems and stop them from getting worse
- It would give the prosthetist an idea with what issues a patient is dealing
- Better measures of what patient’s limb is undergoing throughout the day
- Tell the user when it is time to get a new socket
- Help explain problems that happen outside the prosthetist’s presence
- Determine if problem is caused by the prosthesis, socket, or liner, or how patient is moving
- Useful for dialysis patients, patients with diminished sensation in residual limb, patients who have difficulty reporting symptoms they’re experiencing, and/or for athletes
- More contact with patient will allow clinician to build better bond
- Notifications and data will help preserve the residual limb and prevent further injury, health problems, and amputations
- Use in-office to diagnosis patient problems
- Document outcome measures
- Document K-level for prescribing correct prosthetic components
- Knowing what is happening inside prosthesis
- Getting specific and detailed measurements or information to get better clinical outcomes
- Using metrics to help prosthetist with diagnosing special patients
- Help keep medical costs down
- Get a daily pattern of what patient is actually doing to help provide better education

## Potential Inconveniences

- Cost
- Getting irrelevant information
- May affect weight, bulk, size, and aesthetics of prosthesis
- Extra burden of plugging something in
- Sensors may come off and necessitate a trip to the clinical office
- Sensors may cause skin breakdown
- Sensors may prevent the skin from breathing
- Sensor adhesive may cause allergic reaction
- Extra burden of having to wear something else
- Needing to wear more than 5 sensors at the same time
- Taking more than 3 minutes to set up
- System maintenance and durability (e.g. having something else to charge or wire breakages)
- Upgrading software
- System and software failures
- Overwhelming amount of alerts
- Reliability of patients in following instructions
- When the system or software does not work and the users cannot get the information
- Technological challenges
- False alarms
- Inability for electronics to get wet
- If it is integrated into the liner, having to get a new system when liners need to be changed
- Time it takes to repair the system if it is integrated into the liner or socket
- Might be invasive to monitor where patients have been and what they have been doing
- If the sensor placement has to be very accurate
- Time it takes to learn how to use the system and interpret the data

## Health Concerns

- Cancerous effects of electrical waves
- Skin absorbing sensor materials
- Skin sensitivity to friction from sensors
- Stickiness of sensor material may cause problems (e.g., very sticky adhesives can tear the skin of diabetic patients who have paper thin skin)

## Reimbursement Justification

- Quantifiable data could be used for justification for socket replacement
- Information about skin breakdown or volume change issues for Medicare reimbursement
- Help reduce hours spent writing repayment audit letters
- Help document K-level

# VISION FOR RESIDUAL LIMB MONITORING SYSTEM (RLMS)

## Desired Measurements

- Pressure
- Temperature/heat
- To get a sense of where the pain is as opposed to relying on subjective feedback
- Moisture/humidity
- Locate where there is volume loss (e.g., proximal, distal, middle of limb)
- Amount of pistoning
- Catastrophic failure
- Limb volume throughout the day
- Consistency of fit throughout the day
- Neuromuscular activity
- Monitor skin integrity
- Locations on residuum where there is contact/no contact at the socket-limb interface
- Shear
- Duration of prosthesis wear
- Orientation – if patient donned liner correctly or if residual limb is not lined up right or too far in socket
- Step count
- Type of activity patient is performing
- Daily pattern of what patient is doing
- GPS
- Track stops and walking speed
- Tissue consistency throughout the day

## Length of Use

- Temporary
- Throughout the day, daily
- A couple of days
- In-office (1-2 hrs)

## Measurement Sites

- Distal end
- Every square inch/global measurements
- 3-5 sites at a time
- Bony areas, cut bones
- Bony prominences
- Distal lateral, proximal-medial, distal part to anterior
- Pressure sensitive areas
- Soft tissue weight bearing areas

## Sensor Characteristics

- - Low profile
  - Do not interfere with the function of the prosthesis
  - Minimal impact on weight, bulk, and cosmesis of prosthesis
  - Minimize the number of components
  - Reusable, washable
  - Wireless
  - Connects to Android or iPhone
- Non-toxic
- Like a tattoo
- Extremely thin, thinner than paper
- Tiny, wouldn’t take much electricity or give off much electricity
- Wouldn’t cause any extra pressure or sores
- Powered by motion
- Like the new skin you use for blisters

## Sensor Location

- On the limb
- Integrated in liner
- Integrated in socket
- Outer surface of socket
- Not on the skin

## System Goals

- Reduce number of clinical visits dealing with residual limb health/issues
- Turn quantitative data into periodic print outs summarizing the biomechanics inside the socket (e.g. weekly or monthly)
- Use to diagnose issues (e.g., can see the temperature, pressure, and time when a blister formed, and then link it to what the patient was doing at that time/day)
- Improve patient physical performance
- Provide some kind of benefit and improvement plan
- Generates a solution (e.g., data suggests a new liner is needed and prompts the prosthetist to order a new liner and call the patient into the clinical office)
- Use system information to understand how biomechanics inside socket change with different physical activities
- Use system information to develop better prosthetic technology
- Information to help the patient better understand issues (e.g. specific type of pain felt when residual limb is bottoming out or how less pain is felt when adding a sock ply)
- Use system information to determine what factors (e.g., socket, liner, etc.) are causing residual limb problems
- Alert user when it is time to get a new socket
- Provide detailed information that results in better clinical decisions and patient outcomes
- A trouble-shooting app
- In-office tool
- Provide real-time monitoring for diabetic patients who go through dialysis and constantly have challenges related to socket fit
- Alert patients when problem occurs before problem becomes severe
- Once the system determines what the problem is, have it provide a checklist (what is provided in the office) of troubleshooting options the patient can use
- Mechanism in socket will use quantitative data to make adjustments to the socket (e.g., decrease pressure with bladders based on system data)
- Use system information to help determine when to be patient-specific in troubleshooting/diagnosing
- Help preserve the residual limb and prevent further injury, health problems, and further amputations
- Alert the patient to contact their prosthetist when a problem is detected
- Act as a substitute for patient feedback
- Help distinguish between pressure profiles that may look the same but need to be treated differently depending on cause of amputation

# SUGGESTIONS FOR CONFIGURATION OF RESIDUAL LIMB MONITORING SYSTEM (RLMS)

## Alert

- Alert the user (patient)
- Alert the prosthetist*
- Alerts based on severity of the problem
- Customizable alerts (when alert goes off, type of notification)
- Specific sounds for different problems
  - Not a loud noise (vibration or single beep)
- Get a phone call or text message if there is no WiFi access
- Email or a beep
- Warning alarm
- Do not want false alarms
- Ability to open the app and see the data versus a ding every time there is a problem
- Alert prosthetist of an issue before the problem becomes severe

## Data Collection

- Ongoing monitoring
- Wireless data collection
- Even though data is collected outside the clinical office, downloading of the data would occur in the prosthetist's office
- Real-time synching
- Have all the data collection and acquisition in clinical office
- Collect baseline data of when the prosthesis is fitting well
- Connect with Android and/or iPhone
- Use for both short- and long-term data collection
- Start it out in the office, send it out in a trial, or use during the check socket phase
- Collect data through an app while patient is out of the clinical office
- Minimize the number of components needed to collect/send data

## Data Sharing

- Share data with patient
- Share data with prosthetist
- A website to share data with prosthetist and maybe surgeon
- Secure login required to access data
- Patient and prosthetist alerted simultaneously
- Patient compiles the data and then brings it in to the clinical office
- Some mechanism to include data in medical record
- If only the prosthetist gets the data, have a mechanism for the prosthetist to share a report or graphic with the patient
- Have an option for the patient to send data to their prosthetist

## Data Storage

- In an app on a portable device (e.g. iPhone, Android, or tablet)
- Upload to a website
- Weekly printout of what is going on inside socket, transfer data to something else
- Some mechanism to include data in medical record
- Export the data, print it, and file it
- Store the information and then once patient comes back into the office, prosthetist can retrieve it

## Data Viewing

- Spikes in measurements
- On Android or iPhone
- On an app
- On a website
- A summary of the data
- Shows where on the residual limb there is too much pressure
- Different colors to represent level of severity of problem (e.g., green, yellow, red)
- See what is happening inside socket on a screen (e.g., nerve sensation)
- Charts with time stamps
- Graphs
- Graphic that can be shared with the patient
